# Supplementary material for: Intranasal peptide-induced tolerance and linked suppression: consequences of complement deficiency
Source: Immunology. 2014 Dec 8;144(1):149–57. doi: 10.1111/imm.12358 (PMC4264918; doi:10.1111/imm.12358)
Supplement: Supplementary file 1 [file imm0144-0149-sd1.pdf]

**Supplementary table I:** Primer sequences for real-time RT-PCR.

| Gene         | Forward primer           | Reverse Primer         |
|--------------|--------------------------|------------------------|
| <i>Nos-2</i> | GGCAGCCTGTGAGACCTTTG     | GCATTGGAAGTGAAGCGTTTC  |
| <i>Arg-1</i> | GGAATCTGCATGGGCAACCTGTGT | AGGGTCTACGTCTCGCAAGCCA |
| <i>IL-4i</i> | AGGACATCTACCAGATGGCA     | CATCTCCCAGGAGCTGCA     |
| <i>C3</i>    | CAAACAGATGTCCCTGACCA     | TGCTTTTGAGTTTGGCATGA   |
| <i>Gapdh</i> | TGTGTCCGTCGTGGATCTGA     | TTGCTGTTGAAGTCGCAGGAG  |

For *Ido1* Mm01143935\_g1 Taqman primer was used.

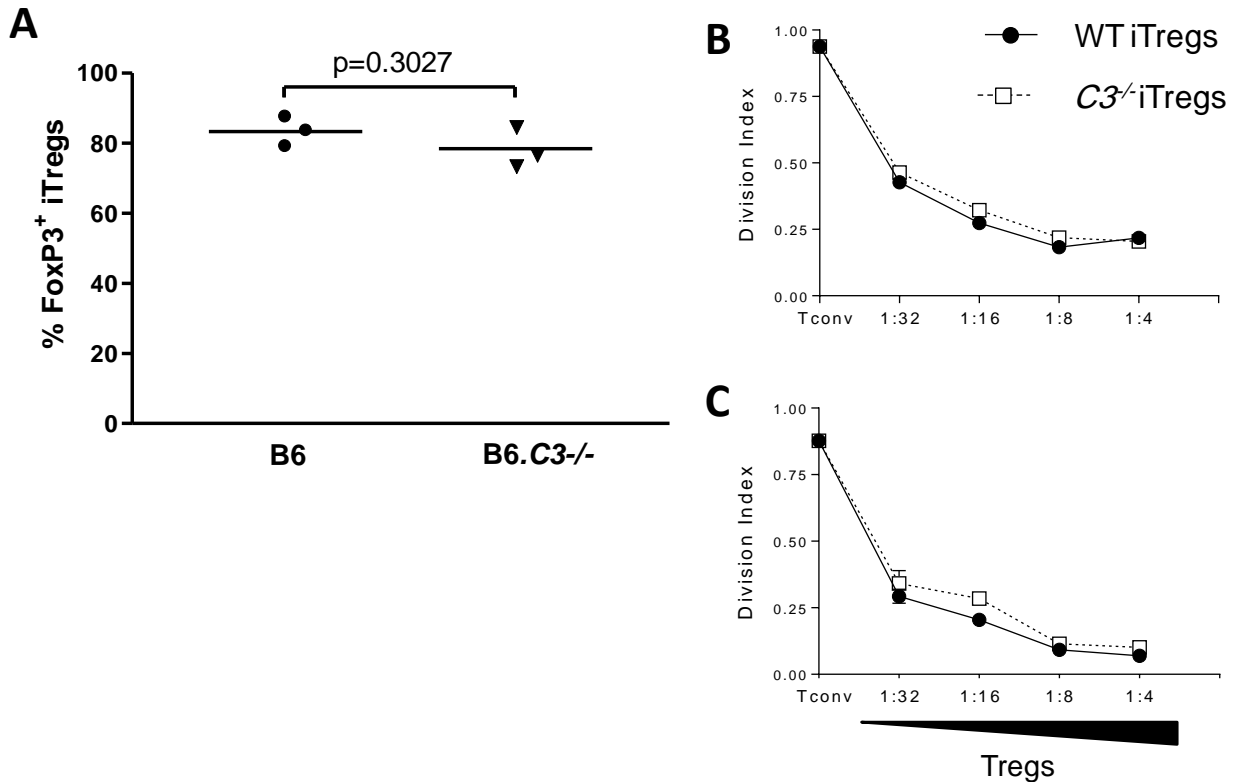

**Supplementary Figure 1: Induction of Treg *in vitro*.**

(A) Purified CD4 T cells from B6 WT (circles) or B6.C3<sup>-/-</sup> (triangles) mice (3 per group) were activated for 3 days with anti-CD3 and anti-CD28 beads, recombinant IL-2 and TGF- $\beta$  in the presence of an anti-IFN- $\gamma$  antibody. The percentage of Foxp3<sup>+</sup> CD4<sup>+</sup> T cells was analysed by flow cytometry. (B) and (C) Suppression assays with iTreg. CFSE-labelled CD25-CD4<sup>+</sup> responder T cells from B6 WT (B) or B6.C3<sup>-/-</sup> (C) mice were stimulated with anti-CD3 and CD28 beads in the presence of increasing concentrations of iTregs from WT B6 (closed circles) or B6.C3<sup>-/-</sup> (open squares) mice. The division index of the responder cells was used to assess the proliferation. The data are representative of three independent experiments. Data are shown as mean  $\pm$  SEM.

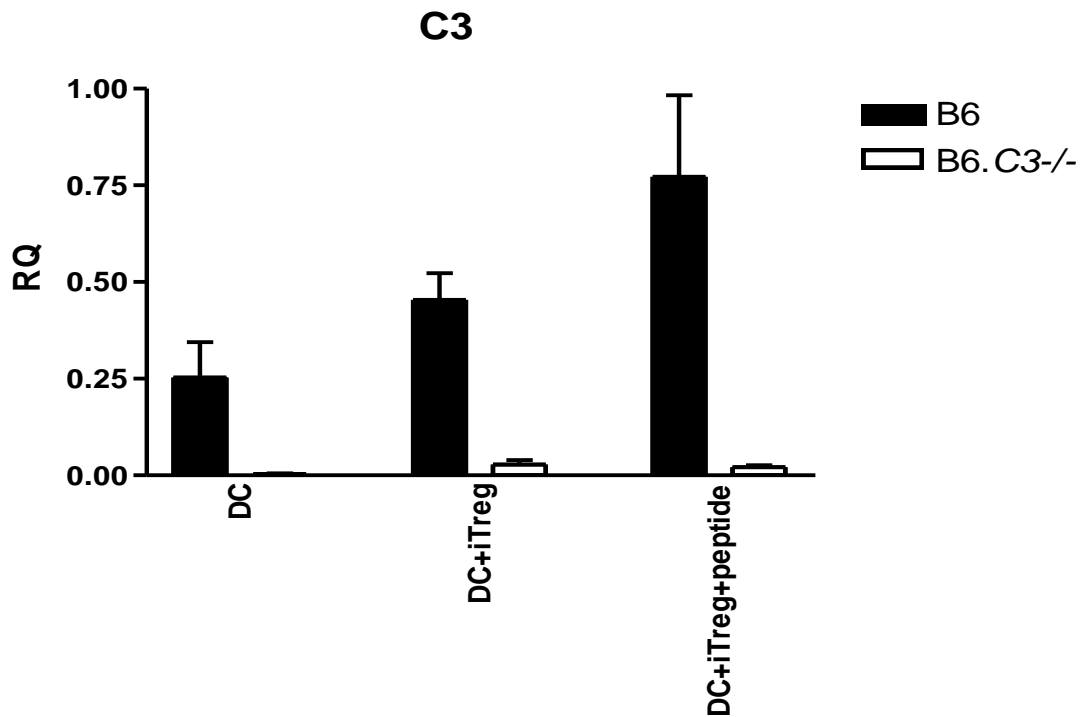

**Supplementary Figure 2:** C3 expression in DC-T cell co-culture conditions. BMDCs from B6 WT (filled columns) or C3-deficient mice (open columns) were cultured either alone or with induced Marilyn Treg (ratio 1:1), in the absence or in the presence of 1nM HY-A<sup>b</sup>D<sub>by</sub> peptide for 48 hours. Samples were then analysed for C3 expression by real-time PCR using specific primers for C3. (Supplementary Table I) Relative expressions were normalised to *Gapdh*. The low levels of C3 expression detected in C3-deficient conditions originated from the C3 sufficient Marilyn T cells. Data are represented as relative quantification (RQ), mean of 7 individual biological replicates  $\pm$  SEM.
